# Supplementary material for: Melatonin Enhances Mitophagy by Upregulating Expression of Heat Shock 70 kDa Protein 1L in Human Mesenchymal Stem Cells under Oxidative Stress
Source: PubMed Central journal article supplement (PMC6769944; doi:10.3390/ijms20184545), 2019-09-13
Supplement: ijms-20-04545-s001.pdf [file ijms-20-04545-s001.pdf]

# Supplementary Figure

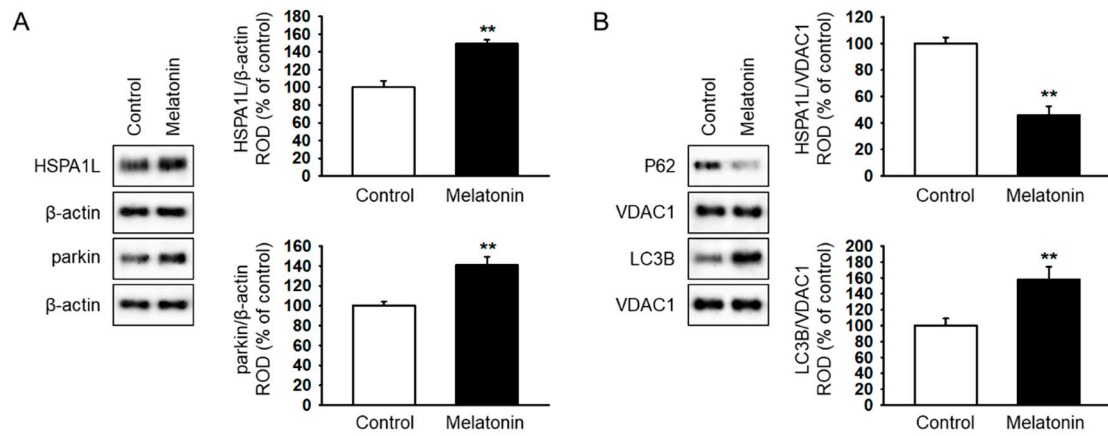

**Supplementary Figure S1.** Melatonin induces mitophagy by increasing the expression of HSPA1L and parkin. (A) Expression of HSPA1L and parkin in hMSCs treated with or without melatonin (1  $\mu$ M) for 24 h. The expression levels of HSPA1L and parkin were normalized with respect to that of  $\beta$ -actin. Values represent the mean  $\pm$  SEM. \*\* $p < 0.01$  vs. untreated hMSCs. (B) Expression of P62 and LC3B in hMSCs treated with or without melatonin (1  $\mu$ M) for 24 h. The expression levels of P62 and LC3B were normalized with respect to that of VDAC1. Values represent the mean  $\pm$  SEM. \*\* $p < 0.01$  vs. untreated hMSCs.

A

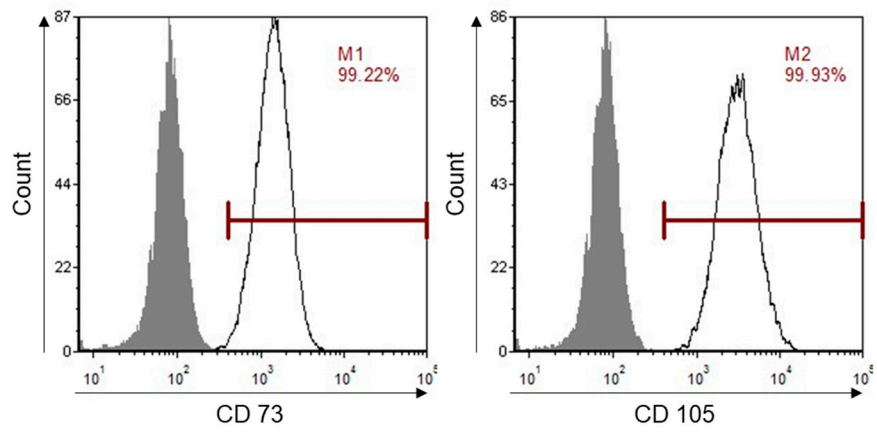

**Supplementary Figure S2.** Expression of hMSC surface markers. (A) MSC surface markers, including CD73, and CD105 were analyzed using flow cytometry. Gray lines indicate cell stained with isotype-matched IgG as a negative control. Black lines indicate cell stained with the indicated antibody.

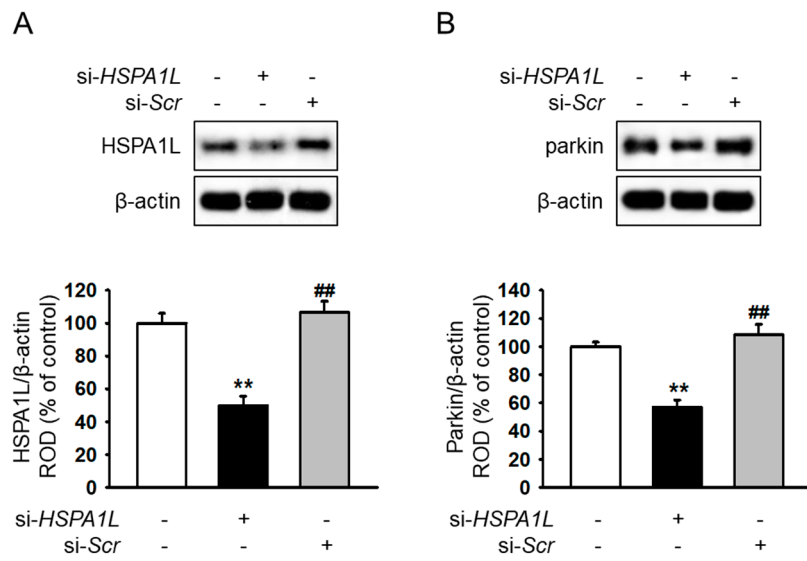

**Supplementary Figure S3.** Expression of HSPA1L and parkin in hMSCs after treatment with scrambled siRNA or si-HSPA1L. (A) Expression of HSPA1L in hMSCs treated with si-HSPA1L or scrambled siRNA (si-Scr). The expression level of HSPA1L was normalized with respect to that of β-actin. Values represent the mean ± SEM. \*\*p < 0.01 vs. untreated hMSCs, and ##p < 0.01 vs. treated si-HSPA1L. (B) Expression of parkin in hMSCs treated with or without melatonin (1 μM) for 24 h. The expression level of parkin was normalized with respect to that of β-actin. Values represent the mean ± SEM. \*\*p < 0.01 vs. untreated hMSCs, and ##p < 0.01 vs. treated si-HSPA1L.

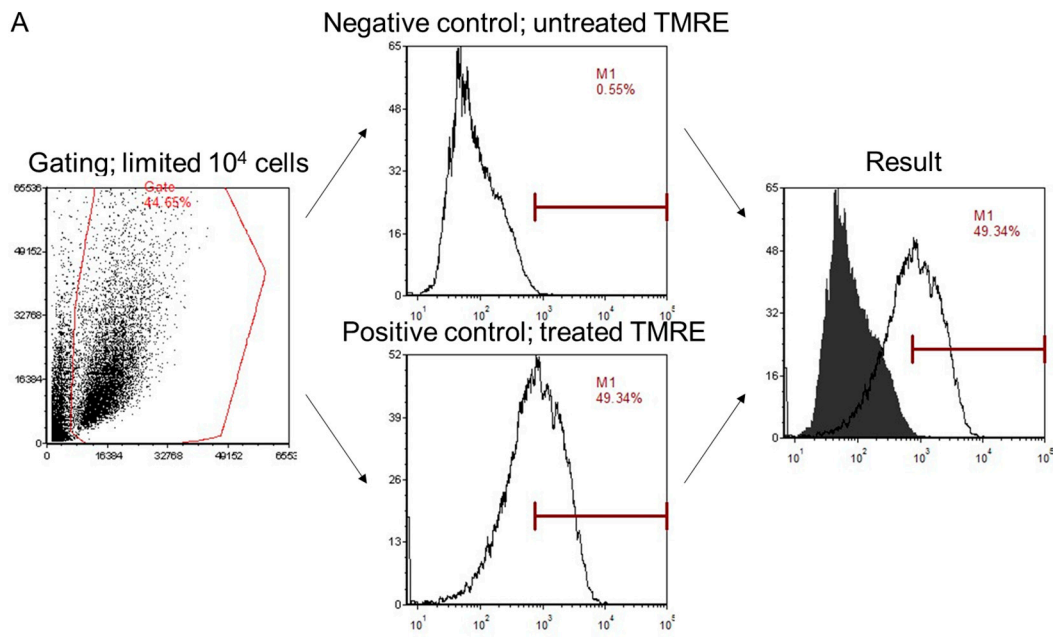

**Supplementary Figure S4.** FACS analyzed gating cells to distinguish the live cells from the total population. (A) Gray lines indicate the population of hMSCs untreated with TMRE as a negative control. Black lines indicate hMSCs stained with TMRE.

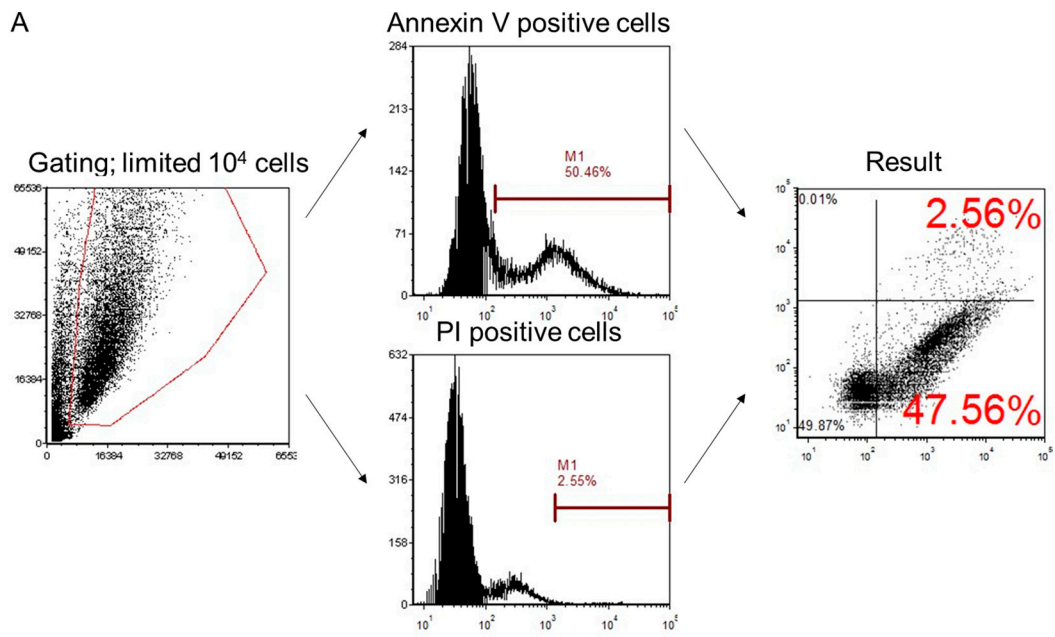

**Supplementary Figure S5.** Compensation of flow cytometry assay for Annexin V/PI staining. (A) Histograms for gating cells, Annexin V positive cells, PI positive cells, and Annexin/PI double positive cells.
